# Supplementary material for: Optical properties of coated black carbon aggregates: numerical simulations, radiative forcing estimates, and size-resolved parameterization scheme
Source: Copernicus journal article supplement (doi:10.5194/acp-21-12989-2021), 2021-09-02
Supplement: Supplementary file 1 [file acp-21-12989-2021-supplement.pdf]

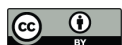

*Supplement of*

## **Optical properties of coated black carbon aggregates: numerical simulations, radiative forcing estimates, and size-resolved parameterization scheme**

**Baseerat Romshoo et al.**

*Correspondence to:* Baseerat Romshoo (baseerat@tropos.de)

The copyright of individual parts of the supplement might differ from the article licence.

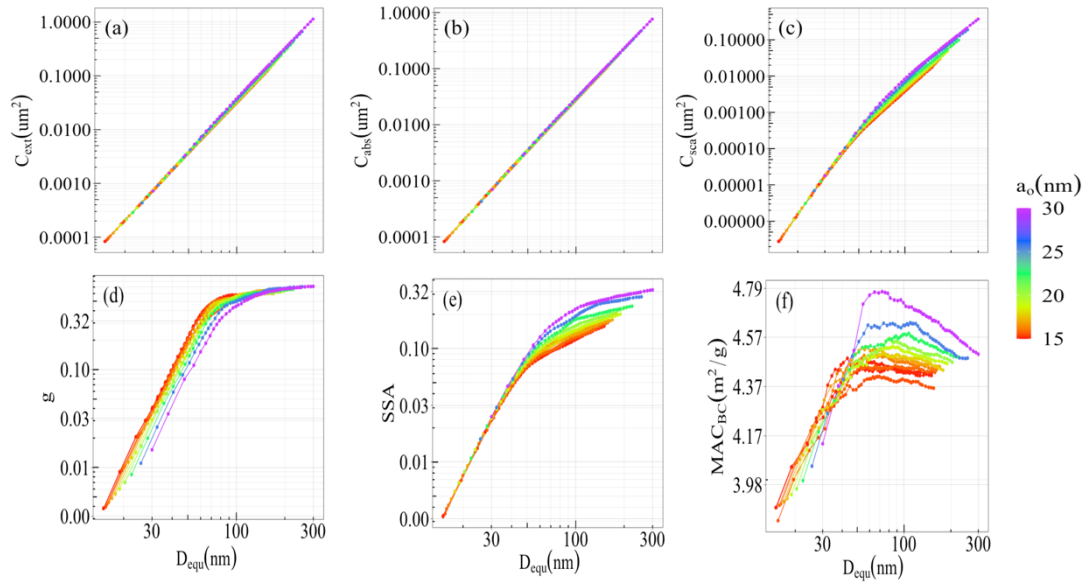

**Figure S1.** Optical properties of pure BCFA for various radii of primary particles ( $a_0$ ) as a function of the volume equivalent radius ( $R_{\text{equ}}$ ): (a) extinction cross-section  $C_{\text{ext}}$ , (b) absorption cross-section  $C_{\text{abs}}$ , (c) scattering cross-section  $C_{\text{sca}}$ , (d) asymmetry parameter  $g$ , (e) single scattering albedo  $SSA$ , and (f) black carbon mass absorption cross-section  $MAC_{\text{BC}}$  at  $\lambda = 660\text{nm}$ .

5

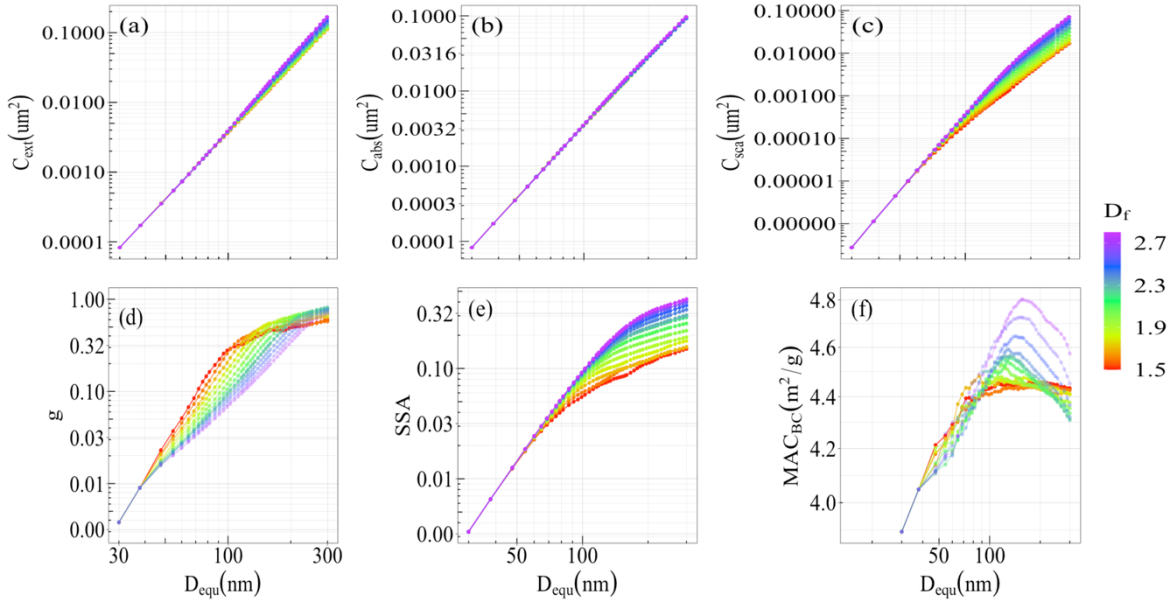

**Figure S2.** Optical properties of pure BCFA as a function of volume equivalent radius ( $R_{\text{equ}}$ ) for various fractal dimension ( $D_f$ ): (a) extinction cross-section  $C_{\text{ext}}$ , (b) absorption cross-section  $C_{\text{abs}}$ , (c) scattering cross-section  $C_{\text{sca}}$ , (d) asymmetry parameter  $g$ , (e) single scattering albedo  $SSA$ , and (f) black carbon mass absorption cross-section  $MAC_{\text{BC}}$  at  $\lambda = 660\text{nm}$ .

10

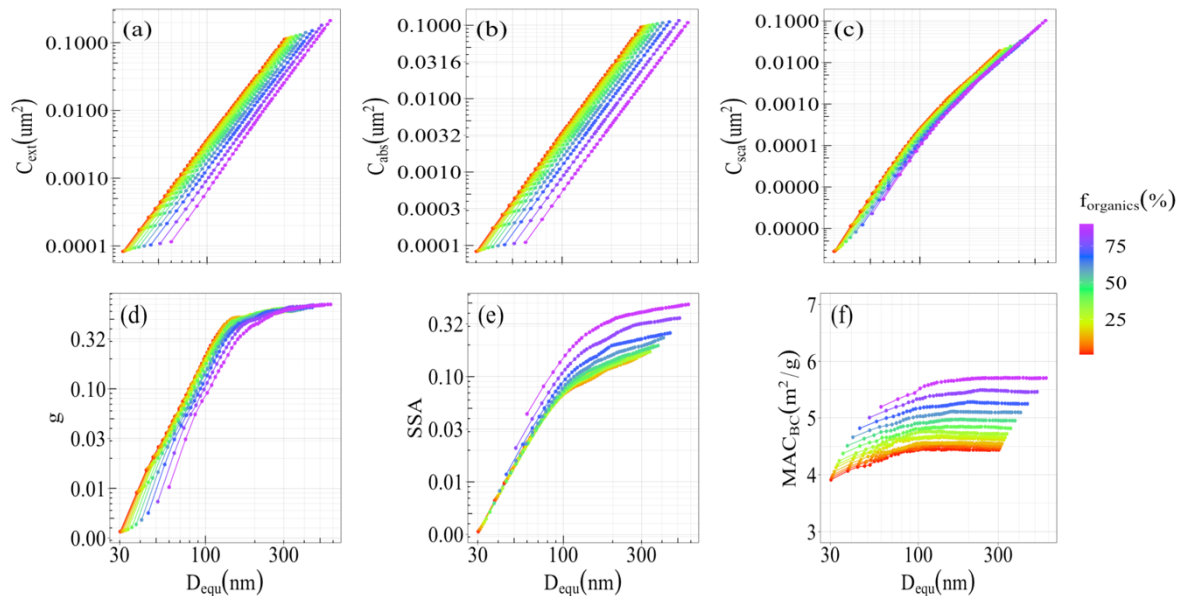

15 **Figure S3.** Optical properties of BCFAs ( $D_f = 1.7$ ) as a function of volume equivalent radius ( $R_{\text{equ}}$ ) for various fraction of organics ( $f_{\text{organics}}$ ): (a) extinction cross-section  $C_{\text{ext}}$ , (b) absorption cross-section  $C_{\text{abs}}$ , (c) scattering cross-section  $C_{\text{sca}}$ , (d) asymmetry parameter  $g$ , (e) single scattering albedo  $SSA$ , and (f) black carbon mass absorption cross-section  $MAC_{\text{BC}}$  at  $\lambda = 660\text{nm}$ .

20

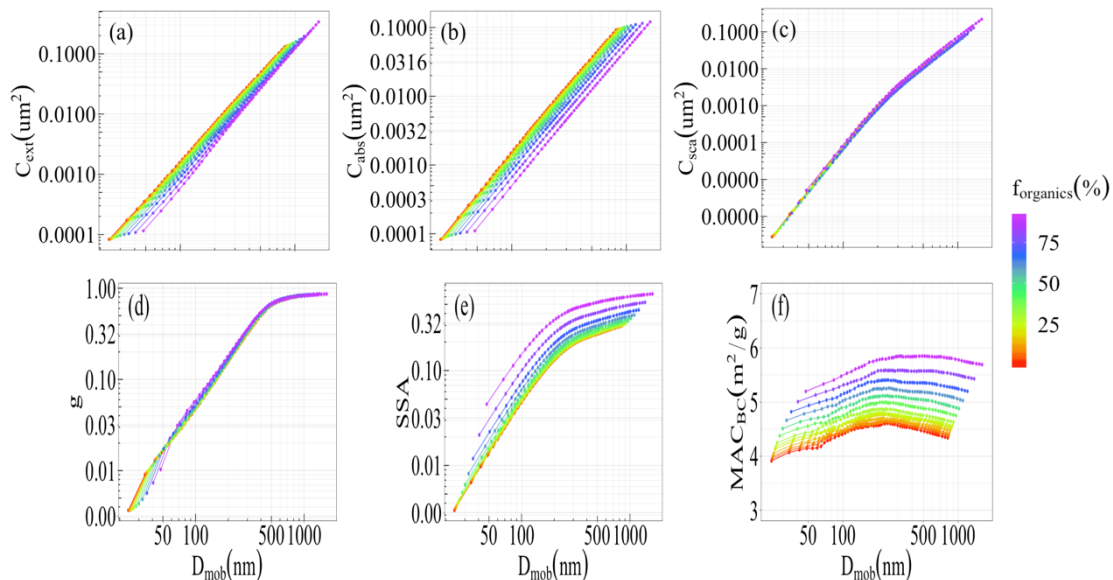

25 **Figure S4.** Optical properties of BCFAs ( $D_f = 2.2$ ) as a function of  $D_{\text{mob}}$  for various fraction of organics ( $f_{\text{organics}}$ ): (a) extinction cross-section  $C_{\text{ext}}$ , (b) absorption cross-section  $C_{\text{abs}}$ , (c) scattering cross-section  $C_{\text{sca}}$ , (d) asymmetry parameter  $g$ , (e) single scattering albedo  $SSA$ , and (f) black carbon mass absorption cross-section  $MAC_{\text{BC}}$  at  $\lambda = 660\text{nm}$ .

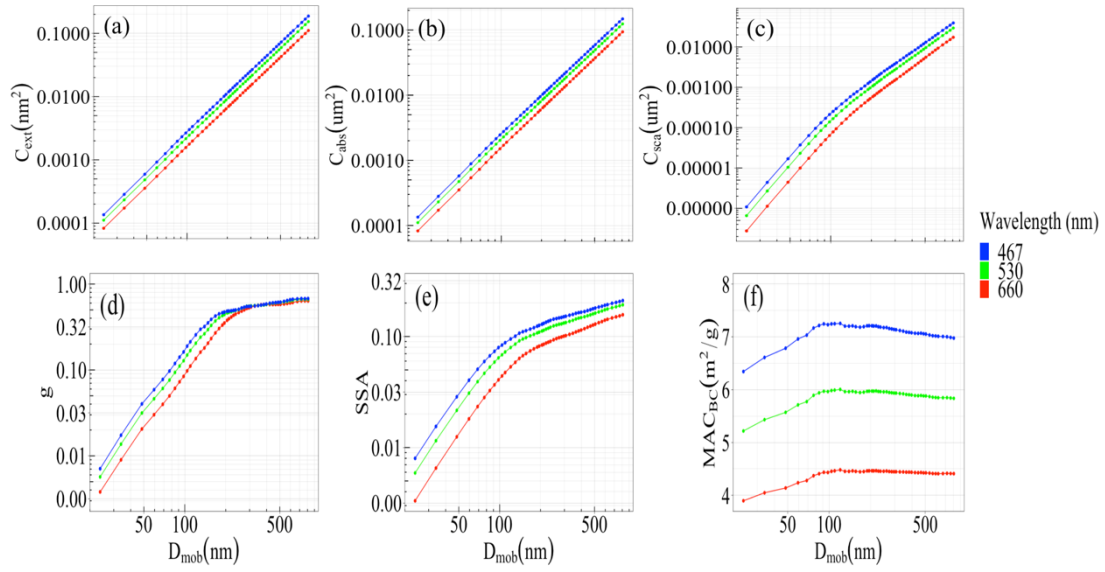

30 **Figure S5.** Optical properties of pure BCFA ( $D_f = 1.7$ ) as a function of  $D_{mob}$  for various wavelengths ( $\lambda$ ): (a) extinction cross-section  $C_{ext}$ , (b) absorption cross-section  $C_{abs}$ , (c) scattering cross-section  $C_{sca}$ , (d) asymmetry parameter  $g$ , (e) single scattering albedo  $SSA$ , and (f) black carbon mass absorption cross-section  $MAC_{BC}$ .

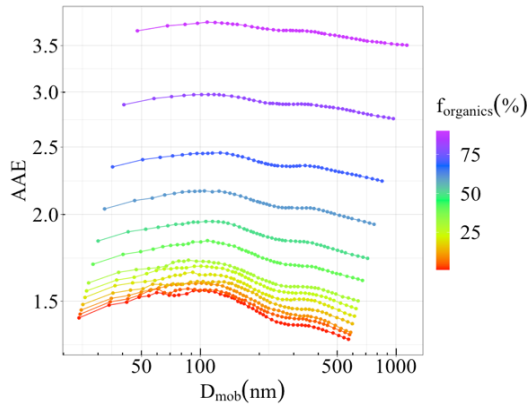

35 **Figure S6.** Ångström Absorption Exponent (AAE) of slightly compact BCFA ( $D_f = 2.2$ ) with changing fraction of organics ( $f_{organics}$ ) and mobility diameter ( $D_{mob}$ ).

### Bulk optical properties of BCFA

40 For application over the atmosphere, it is more meaningful to know the averaged optical properties over a certain particle size distribution, i.e. the bulk optical properties. Bulk optical properties of BC are useful since they can be used directly for simulations of radiative forcing. The bulk optical properties of BCFA are calculated with an assumption that the mobility diameter  $D_{mob}$  of BCFA follow a lognormal size distribution:

$$45 \quad n(D_{mob}) = \frac{1}{\sqrt{\pi} D_{mob} \ln(\sigma)} \exp \left[ - \left[ \frac{\ln(D_{mob}/2) - \ln(D_{mob_0}/2)}{\sqrt{2} \ln(\sigma)} \right]^2 \right], \quad (1)$$

where  $D_{mob_0}$  is the geometric mean mobility diameter, and  $\sigma$  is the standard deviation in  $\ln(D_{mob})$ .

50 Table 4 shows the bulk optical properties of BCFA for various compositions and morphologies at a wavelength of 530 nm. For each case, the bulk optical properties are calculated as integrals over the lognormal size distribution  $n(D_{mob})$  with limits of  $D_{mob}$  varying from 0.030 to 0.60  $\mu\text{m}$ , and the corresponding MSTM calculated values. The calculations are done following the mathematical formulas summarised in Li et al (2016).

55 **Table S1.** Bulk optical properties of black carbon for different fraction of organics ( $f_{\text{organics}}$ ) and fractal dimension ( $D_f$ ) at a wavelength of 530nm.

|                                                    | $f_{\text{organics}}$ (%) |      |      |      |      |      |      |      |      |      |      |      |      |      |
|----------------------------------------------------|---------------------------|------|------|------|------|------|------|------|------|------|------|------|------|------|
|                                                    | 0                         | 1    | 5    | 10   | 15   | 20   | 25   | 30   | 40   | 50   | 60   | 70   | 80   | 90   |
| $D_f = 1.7$                                        |                           |      |      |      |      |      |      |      |      |      |      |      |      |      |
| $C_{\text{ext}} (\times 10^{-2} \mu\text{m}^{-2})$ | 2.94                      | 2.96 | 3.02 | 3.03 | 3.04 | 3.12 | 3.12 | 3.14 | 3.18 | 3.14 | 3.08 | 2.92 | 2.74 | 2.35 |
| $C_{\text{abs}} (\times 10^{-2} \mu\text{m}^{-2})$ | 2.54                      | 2.55 | 2.58 | 2.60 | 2.62 | 2.65 | 2.66 | 2.67 | 2.66 | 2.60 | 2.48 | 2.25 | 1.86 | 1.35 |
| $C_{\text{sca}} (\times 10^{-2} \mu\text{m}^{-2})$ | 0.40                      | 0.41 | 0.44 | 0.43 | 0.42 | 0.47 | 0.47 | 0.47 | 0.52 | 0.54 | 0.61 | 0.67 | 0.88 | 1.00 |
| $SSA$                                              | 0.14                      | 0.14 | 0.15 | 0.14 | 0.14 | 0.15 | 0.15 | 0.15 | 0.16 | 0.17 | 0.20 | 0.23 | 0.32 | 0.43 |
| $g$                                                | 0.60                      | 0.58 | 0.57 | 0.60 | 0.59 | 0.59 | 0.61 | 0.57 | 0.62 | 0.60 | 0.60 | 0.62 | 0.64 | 0.63 |
| $D_f = 2.2$                                        |                           |      |      |      |      |      |      |      |      |      |      |      |      |      |
| $C_{\text{ext}} (\times 10^{-2} \mu\text{m}^{-2})$ | 0.03                      | 0.03 | 0.03 | 0.04 | 0.04 | 0.04 | 0.04 | 0.04 | 0.04 | 0.04 | 0.04 | 0.04 | 0.03 | 0.03 |
| $C_{\text{abs}} (\times 10^{-2} \mu\text{m}^{-2})$ | 0.03                      | 0.03 | 0.03 | 0.03 | 0.03 | 0.03 | 0.03 | 0.03 | 0.03 | 0.03 | 0.02 | 0.02 | 0.02 | 0.01 |
| $C_{\text{sca}} (\times 10^{-2} \mu\text{m}^{-2})$ | 0.01                      | 0.01 | 0.01 | 0.01 | 0.01 | 0.01 | 0.01 | 0.01 | 0.01 | 0.01 | 0.01 | 0.01 | 0.02 | 0.02 |
| $SSA$                                              | 0.25                      | 0.26 | 0.26 | 0.26 | 0.26 | 0.27 | 0.27 | 0.27 | 0.29 | 0.31 | 0.33 | 0.37 | 0.45 | 0.57 |
| $G$                                                | 0.70                      | 0.69 | 0.70 | 0.70 | 0.71 | 0.71 | 0.72 | 0.72 | 0.73 | 0.73 | 0.75 | 0.76 | 0.77 | 0.75 |

### Parametrization for bulk optical properties

60 An important application of the optical parametrization scheme would be calculation of the bulk optical properties of atmospheric BC aerosols. The bulk optical properties can be calculated between any limits of mobility diameter ( $D_{\text{mob}}$ ), for the cases of fractal dimension ( $D_f$ ), fraction of organics ( $f_{\text{organics}}$ ), and wavelength ( $\lambda$ ) provided in the parametrization scheme. Following Eq. (1), it must be assumed that the mobility diameter ( $D_{\text{mob}}$ ) of the BCFAs follow a log normal distribution:

$$65 \quad n(D_{\text{mob}}) = \frac{1}{\sqrt{2\pi} \overline{D_{\text{mob}}} \ln(\sigma)} \exp \left[ - \left[ \frac{\ln(D_{\text{mob}}) - \ln(\overline{D_{\text{mob}}})}{\sqrt{2} \ln(\sigma)} \right]^2 \right], \quad (2)$$

where  $\overline{D_{\text{mob}}}$  is the arithmetic mean diameter, and  $\sigma$  is the standard deviation in  $\ln(D_{\text{mob}})$ .

70 The bulk extinction cross-section is given by:

$$\langle C_{\text{ext}} \rangle = \int_{D_{\text{mob}}^{\text{min}}}^{D_{\text{mob}}^{\text{max}}} C_{\text{ext}}(D_{\text{mob}}, D_f, f_{\text{organics}}, \lambda) n(D_{\text{mob}}) d(D_{\text{mob}}), \quad (3)$$

using the parametrization scheme for extinction cross-section,

$$75 \quad \langle C_{\text{ext}} \rangle = \int_{D_{\text{mob}}^{\text{min}}}^{D_{\text{mob}}^{\text{max}}} (e^{C_0} + e^{C_1} D_{\text{mob}}) n(D_{\text{mob}}) d(D_{\text{mob}}). \quad (4)$$

The values of the coefficients  $C_0$  and  $C_1$  must be chosen from their tabulated values for various cases of fractal dimension ( $D_f$ ), fraction of organics ( $f_{\text{organics}}$ ), and wavelength ( $\lambda$ ) provided in the section of supplementary below.

80 Similarly, using the parametrization schemes provided, the corresponding bulk optical properties can be calculated as:

$$\langle C_{\text{abs}} \rangle = \int_{D_{\text{mob}}^{\text{min}}}^{D_{\text{mob}}^{\text{max}}} (e^{g_0} + e^{g_1} D_{\text{mob}}) n(D_{\text{mob}}) d(D_{\text{mob}}), \quad (5)$$

$$85 \quad \langle C_{\text{sca}} \rangle = \int_{D_{\text{mob}}^{\text{min}}}^{D_{\text{mob}}^{\text{max}}} (e^{H_0} + e^{H_1} D_{\text{mob}} + e^{H_2} \ln D_{\text{mob}}) n(D_{\text{mob}}) d(D_{\text{mob}}), \quad (6)$$

$$\langle SSA \rangle = \int_{D_{\text{mob}}^{\text{min}}}^{D_{\text{mob}}^{\text{max}}} (e^{k_0} + e^{k_1} D_{\text{mob}} + e^{k_2} \ln D_{\text{mob}}) n(D_{\text{mob}}) d(D_{\text{mob}}), \quad (7)$$

$$\langle g \rangle = \int_{D_{\text{mob}}^{\text{min}}}^{D_{\text{mob}}^{\text{max}}} (e^{s_0} + e^{s_1} D_{\text{mob}} + e^{s_2} D_{\text{mob}}^2 + e^{s_3} D_{\text{mob}}^3) n(D_{\text{mob}}) d(D_{\text{mob}}). \quad (8)$$

The relative errors between the bulk optical properties from the MSTM calculations and the parametrization scheme are comparable to that in the case of single sized BCFA's shown in the section 3.7.1.

**Parametrization scheme for optical properties of BCFAs**

$$\ln C_{ext} = c_0 + c_1 \ln D_{mob}$$

105  $\ln C_{abs} = g_0 + g_1 \ln D_{mob}$

$$\ln C_{sca} = H_0 + H_1 \ln D_{mob} + H_2 \ln (\ln D_{mob})$$

$$\ln SSA = k_0 + k_1 \ln D_{mob} + k_2 \ln (\ln D_{mob})$$

110

$$\ln g = \sum_{n=0}^3 s_n \ln D_{mob}^n$$

**Table S2.** Parameterization scheme for coated and non-coated black carbon fractal aggregates (BCFA).

| $\lambda$ | $D_f$ | $f_{organics}$ | $c_0$    | $c_1$  | $g_0$    | $g_1$  | $H_0$    | $H_1$   | $H_2$   | $s_0$     | $s_1$    | $s_2$    | $s_3$   | $k_0$    | $k_1$   | $k_2$   |
|-----------|-------|----------------|----------|--------|----------|--------|----------|---------|---------|-----------|----------|----------|---------|----------|---------|---------|
| 660       | 1.5   | 0              | -15.7525 | 2.0244 | -15.4847 | 1.9605 | -24.2159 | 1.9921  | 3.5801  | -46.0080  | 21.3332  | -3.3873  | 0.1816  | -8.8739  | -0.1242 | 4.1179  |
| 660       | 1.5   | 5              | -15.7550 | 2.0214 | -15.5059 | 1.9597 | -31.3601 | 0.2872  | 13.3115 | 0.6842    | -2.4337  | 0.6085   | -0.0406 | -14.9613 | -1.5899 | 12.4673 |
| 660       | 1.5   | 25             | -15.8438 | 2.0177 | -15.6260 | 1.9616 | -24.6220 | 1.6677  | 4.8432  | 9.8861    | -7.6666  | 1.5889   | -0.1010 | -8.5946  | -0.3101 | 4.6065  |
| 660       | 1.5   | 50             | -16.1005 | 2.0298 | -15.8183 | 1.9591 | -21.4000 | 2.3674  | 0.6833  | -33.6550  | 14.4609  | -2.1386  | 0.1072  | -6.1086  | 0.1704  | 1.6966  |
| 660       | 1.5   | 70             | -16.4923 | 2.0594 | -16.1146 | 1.9624 | -26.7081 | 1.2486  | 7.4745  | -22.5955  | 8.5255   | -1.0988  | 0.0475  | -10.3414 | -0.8352 | 7.6265  |
| 660       | 1.6   | 0              | -15.7675 | 2.0278 | -15.4998 | 1.9626 | -30.8563 | 0.4502  | 12.5063 | -51.4395  | 23.8510  | -3.7532  | 0.1980  | -14.7285 | -1.4969 | 12.0341 |
| 660       | 1.6   | 5              | -15.7611 | 2.0214 | -15.5484 | 1.9657 | -26.0321 | 1.3267  | 6.8446  | -67.6214  | 31.3213  | -4.9038  | 0.2572  | -10.3641 | -0.7155 | 6.9666  |
| 660       | 1.6   | 25             | -15.8199 | 2.0167 | -15.5835 | 1.9543 | -29.1829 | 0.5997  | 11.0671 | 15.0126   | -11.1566 | 2.3105   | -0.1478 | -13.2172 | -1.3853 | 10.8791 |
| 660       | 1.6   | 50             | -16.0327 | 2.0207 | -15.7920 | 1.9548 | -23.5291 | 1.7441  | 4.0211  | -28.7900  | 10.8963  | -1.3692  | 0.0558  | -7.9102  | -0.3621 | 4.5393  |
| 660       | 1.6   | 70             | -16.3849 | 2.0426 | -16.0953 | 1.9595 | -23.9888 | 1.6021  | 4.7863  | -52.7974  | 22.7540  | -3.3130  | 0.1616  | -7.2572  | -0.3732 | 4.3668  |
| 660       | 1.7   | 0              | -15.6665 | 2.0113 | -15.4404 | 1.9526 | -22.7664 | 2.0195  | 2.7341  | -135.7843 | 65.3114  | -10.5239 | 0.5659  | -7.4564  | -0.0716 | 3.2013  |
| 660       | 1.7   | 1              | -15.7172 | 2.0183 | -15.4884 | 1.9588 | -25.8963 | 1.3457  | 6.7473  | -122.5711 | 58.9261  | -9.5008  | 0.5114  | -10.3542 | -0.7121 | 6.9776  |
| 660       | 1.7   | 5              | -15.7239 | 2.0186 | -15.4929 | 1.9569 | -31.7647 | -0.0265 | 14.6745 | -50.8588  | 22.2507  | -3.3079  | 0.1656  | -15.2113 | -1.8591 | 13.5868 |
| 660       | 1.7   | 10             | -15.7602 | 2.0205 | -15.5022 | 1.9557 | -23.8127 | 1.8851  | 3.7649  | -159.7634 | 77.9977  | -12.7479 | 0.6950  | -8.0993  | -0.1458 | 3.8261  |
| 660       | 1.7   | 15             | -15.7845 | 2.0191 | -15.5576 | 1.9598 | -23.2942 | 1.9081  | 3.3738  | -133.6831 | 64.5100  | -10.4305 | 0.5627  | -7.8428  | -0.1847 | 3.8075  |
| 660       | 1.7   | 20             | -15.7825 | 2.0157 | -15.5614 | 1.9552 | -32.8077 | -0.2625 | 16.0185 | -36.1842  | 14.4067  | -1.9131  | 0.0833  | -16.1224 | -2.0803 | 14.8498 |
| 660       | 1.7   | 25             | -15.8531 | 2.0220 | -15.6139 | 1.9591 | -28.1449 | 0.8408  | 9.6764  | -100.6791 | 47.1922  | -7.4289  | 0.3908  | -11.9529 | -1.1075 | 9.2395  |
| 660       | 1.7   | 30             | -15.8519 | 2.0163 | -15.6197 | 1.9546 | -23.9360 | 1.7146  | 4.3721  | -129.5501 | 61.9130  | -9.9117  | 0.5292  | -8.5159  | -0.3948 | 4.9260  |
| 660       | 1.7   | 40             | -16.0243 | 2.0333 | -15.7297 | 1.9594 | -25.4089 | 1.5384  | 5.7834  | -86.7096  | 40.5283  | -6.3706  | 0.3349  | -9.4150  | -0.5013 | 5.8219  |
| 660       | 1.7   | 50             | -16.0639 | 2.0259 | -15.8239 | 1.9597 | -25.9052 | 1.2578  | 6.9899  | -80.3566  | 36.9175  | -5.7005  | 0.2940  | -9.5129  | -0.7003 | 6.5787  |
| 660       | 1.7   | 60             | -16.2345 | 2.0381 | -15.9518 | 1.9608 | -26.0324 | 1.2540  | 7.0923  | -52.0232  | 23.3486  | -3.5458  | 0.1804  | -9.6134  | -0.7470 | 6.8648  |
| 660       | 1.7   | 70             | -16.3536 | 2.0390 | -16.1041 | 1.9606 | -32.1653 | -0.0616 | 14.9674 | -21.9360  | 8.4632   | -1.1023  | 0.0475  | -13.6578 | -1.6823 | 12.3611 |
| 660       | 1.7   | 80             | -16.7395 | 2.0821 | -16.3304 | 1.9612 | -38.0200 | -0.9987 | 21.4747 | 3.1163    | -3.3064  | 0.7257   | -0.0464 | -16.6107 | -2.2156 | 15.9668 |
| 660       | 1.7   | 90             | -16.9556 | 2.1004 | -16.6020 | 1.9615 | -23.2061 | 1.5596  | 4.7601  | -47.3551  | 19.7729  | -2.7880  | 0.1317  | -5.4062  | -0.3913 | 3.7885  |
| 660       | 1.8   | 0              | -15.7101 | 2.0220 | -15.4458 | 1.9541 | -23.8616 | 1.7819  | 4.2225  | -137.0045 | 64.2293  | -10.0778 | 0.5276  | -8.1299  | -0.2353 | 4.1941  |

| $\lambda$ | D <sub>f</sub> | f <sub>organics</sub> | c0       | c1     | g0       | g1     | H0       | H1      | H2      | s0        | s1       | s2       | s3      | k0       | k1      | k2      |
|-----------|----------------|-----------------------|----------|--------|----------|--------|----------|---------|---------|-----------|----------|----------|---------|----------|---------|---------|
| 660       | 1.8            | 5                     | -15.7925 | 2.0314 | -15.4917 | 1.9562 | -27.5406 | 1.0574  | 8.7186  | -115.6974 | 53.8541  | -8.4068  | 0.4385  | -11.5420 | -0.9278 | 8.4485  |
| 660       | 1.8            | 25                    | -15.8439 | 2.0232 | -15.5996 | 1.9570 | -32.3807 | -0.1483 | 15.4265 | -119.8288 | 56.5257  | -8.9570  | 0.4748  | -15.0559 | -1.8492 | 13.5171 |
| 660       | 1.8            | 50                    | -16.0872 | 2.0337 | -15.7961 | 1.9554 | -28.3066 | 0.7812  | 10.0090 | -126.5501 | 58.8226  | -9.1555  | 0.4755  | -11.5542 | -1.1150 | 9.1759  |
| 660       | 1.8            | 70                    | -16.4100 | 2.0521 | -16.0932 | 1.9587 | -30.4162 | 0.3195  | 12.7735 | -55.0677  | 23.9062  | -3.4960  | 0.1710  | -12.5547 | -1.4507 | 11.0171 |
| 660       | 1.9            | 0                     | -15.6963 | 2.0220 | -15.4085 | 1.9471 | -30.0008 | 0.3678  | 12.4687 | -101.7978 | 45.3518  | -6.7572  | 0.3355  | -13.6819 | -1.5148 | 11.6529 |
| 660       | 1.9            | 5                     | -15.7176 | 2.0224 | -15.4146 | 1.9440 | -33.1895 | -0.3221 | 16.5742 | -81.5721  | 35.1277  | -5.0436  | 0.2400  | -16.9354 | -2.2243 | 15.8707 |
| 660       | 1.9            | 25                    | -15.8518 | 2.0280 | -15.5323 | 1.9458 | -26.7767 | 1.1206  | 8.1099  | -90.0003  | 39.0629  | -5.6576  | 0.2724  | -10.8130 | -0.8831 | 7.9656  |
| 660       | 1.9            | 50                    | -16.0837 | 2.0376 | -15.7752 | 1.9522 | -32.2508 | -0.0935 | 15.2303 | -108.9910 | 48.9904  | -7.3835  | 0.3718  | -14.2591 | -1.7368 | 12.8407 |
| 660       | 1.9            | 70                    | -16.4636 | 2.0654 | -16.0805 | 1.9572 | -29.8972 | 0.4238  | 12.1912 | -154.7034 | 71.3913  | -11.0253 | 0.5684  | -11.4088 | -1.2381 | 9.7067  |
| 660       | 2              | 0                     | -15.7288 | 2.0320 | -15.3580 | 1.9389 | -34.4017 | -0.5381 | 18.0565 | -33.7398  | 9.7380   | -0.6146  | -0.0142 | -17.6773 | -2.3471 | 16.7518 |
| 660       | 2              | 5                     | -15.8193 | 2.0434 | -15.4130 | 1.9436 | -34.9233 | -0.5664 | 18.4429 | -35.2785  | 10.9254  | -0.8826  | 0.0045  | -17.9426 | -2.3493 | 16.9198 |
| 660       | 2              | 25                    | -15.9172 | 2.0421 | -15.5335 | 1.9454 | -31.4270 | 0.1639  | 13.9926 | -63.7470  | 24.9933  | -3.1927  | 0.1307  | -14.8040 | -1.7246 | 13.0825 |
| 660       | 2              | 50                    | -16.1849 | 2.0577 | -15.7717 | 1.9513 | -29.1520 | 0.6545  | 11.0481 | -118.3233 | 52.3182  | -7.7371  | 0.3818  | -11.9699 | -1.1972 | 9.7992  |
| 660       | 2              | 70                    | -16.5079 | 2.0789 | -16.0376 | 1.9505 | -30.2661 | 0.4061  | 12.5343 | -120.9526 | 53.6772  | -7.9736  | 0.3955  | -11.7531 | -1.2834 | 10.1079 |
| 660       | 2.1            | 0                     | -15.8414 | 2.0562 | -15.3373 | 1.9359 | -39.6313 | -1.5337 | 24.4085 | 17.0640   | -15.9467 | 3.6574   | -0.2483 | -21.4966 | -3.0761 | 21.4035 |
| 660       | 2.1            | 5                     | -15.8896 | 2.0600 | -15.3784 | 1.9383 | -39.6327 | -1.5065 | 24.3083 | 11.7614   | -13.1479 | 3.1683   | -0.2200 | -21.7129 | -3.1112 | 21.6459 |
| 660       | 2.1            | 25                    | -15.9769 | 2.0580 | -15.4672 | 1.9354 | -36.6508 | -0.8448 | 20.3844 | -9.3617   | -2.4771  | 1.3768   | -0.1200 | -19.2591 | -2.5949 | 18.5602 |
| 660       | 2.1            | 50                    | -16.2544 | 2.0752 | -15.7219 | 1.9439 | -31.6634 | 0.2219  | 13.9815 | -64.7328  | 25.0202  | -3.1550  | 0.1280  | -14.3508 | -1.6346 | 12.6563 |
| 660       | 2.1            | 70                    | -16.6360 | 2.1070 | -16.0171 | 1.9477 | -31.2855 | 0.2983  | 13.5405 | -106.9849 | 45.9556  | -6.6040  | 0.3168  | -12.6759 | -1.4254 | 11.1524 |
| 660       | 2.2            | 0                     | -15.9386 | 2.0773 | -15.2911 | 1.9283 | -42.5466 | -2.0281 | 27.7710 | 45.7660   | -30.3926 | 6.0367   | -0.3769 | -24.0551 | -3.5336 | 24.4260 |
| 660       | 2.2            | 1                     | -15.9574 | 2.0798 | -15.3008 | 1.9291 | -43.5919 | -2.2444 | 29.0821 | 46.5315   | -30.6360 | 6.0537   | -0.3766 | -24.6930 | -3.6613 | 25.2133 |
| 660       | 2.2            | 5                     | -15.9792 | 2.0807 | -15.3260 | 1.9305 | -43.1870 | -2.1503 | 28.5326 | 43.4108   | -29.0778 | 5.7948   | -0.3623 | -24.2837 | -3.5754 | 24.6981 |
| 660       | 2.2            | 10                    | -16.0323 | 2.0866 | -15.3729 | 1.9352 | -42.6450 | -2.0007 | 27.7195 | 43.7349   | -29.2047 | 5.8138   | -0.3634 | -23.5799 | -3.4108 | 23.7542 |
| 660       | 2.2            | 15                    | -16.0398 | 2.0835 | -15.3891 | 1.9333 | -41.6971 | -1.8030 | 26.5155 | 41.3224   | -27.9852 | 5.6071   | -0.3516 | -23.3603 | -3.3780 | 23.5251 |
| 660       | 2.2            | 20                    | -16.0705 | 2.0834 | -15.4080 | 1.9306 | -40.6870 | -1.5654 | 25.1437 | 26.5665   | -20.5268 | 4.3560   | -0.2820 | -22.4621 | -3.1765 | 22.3546 |
| 660       | 2.2            | 25                    | -16.0916 | 2.0824 | -15.4388 | 1.9309 | -40.3342 | -1.4985 | 24.7107 | 25.6997   | -20.0174 | 4.2582   | -0.2758 | -22.1812 | -3.1323 | 22.0528 |
| 660       | 2.2            | 30                    | -16.1225 | 2.0830 | -15.4628 | 1.9297 | -39.9442 | -1.4068 | 24.1787 | 23.4640   | -18.7616 | 4.0265   | -0.2617 | -21.7367 | -3.0403 | 21.5044 |
| 660       | 2.2            | 40                    | -16.2270 | 2.0900 | -15.5465 | 1.9312 | -37.8484 | -0.9401 | 21.4283 | 1.2015    | -7.6087  | 2.1721   | -0.1594 | -19.6995 | -2.6238 | 18.9906 |
| 660       | 2.2            | 50                    | -16.3486 | 2.0984 | -15.6515 | 1.9338 | -36.9895 | -0.7576 | 20.3284 | -21.4244  | 3.7398   | 0.2826   | -0.0549 | -18.3565 | -2.3839 | 17.4674 |
| 660       | 2.2            | 60                    | -16.5134 | 2.1103 | -15.7940 | 1.9373 | -33.2557 | -0.0074 | 15.7181 | -46.7099  | 16.0099  | -1.6927  | 0.0507  | -15.1915 | -1.8062 | 13.8063 |
| 660       | 2.2            | 70                    | -16.7301 | 2.1296 | -15.9601 | 1.9397 | -30.5047 | 0.5188  | 12.4297 | -76.0719  | 30.2332  | -3.9798  | 0.1728  | -12.3894 | -1.3418 | 10.7534 |
| 660       | 2.2            | 80                    | -17.0743 | 2.1681 | -16.2179 | 1.9457 | -28.2245 | 0.9254  | 9.8460  | -116.4726 | 49.5177  | -7.0368  | 0.3338  | -9.3207  | -0.9038 | 7.6881  |
| 660       | 2.2            | 90                    | -17.3836 | 2.2100 | -16.4765 | 1.9450 | -28.7464 | 0.7758  | 10.7484 | -122.6619 | 52.5263  | -7.5212  | 0.3596  | -7.6649  | -0.7847 | 6.5109  |
| 660       | 2.3            | 0                     | -15.9946 | 2.0882 | -15.2844 | 1.9275 | -42.1833 | -1.8499 | 26.9852 | 51.2474   | -32.8655 | 6.4029   | -0.3947 | -23.8961 | -3.4245 | 23.9812 |
| 660       | 2.4            | 0                     | -16.1798 | 2.1247 | -15.2973 | 1.9305 | -44.2697 | -2.1175 | 29.1167 | 62.1700   | -37.9808 | 7.1711   | -0.4318 | -25.6072 | -3.6861 | 25.8635 |
| 660       | 2.5            | 0                     | -16.3614 | 2.1617 | -15.3158 | 1.9358 | -46.7334 | -2.4902 | 31.8049 | 63.2385   | -37.9598 | 7.0546   | -0.4185 | -27.2020 | -3.9418 | 27.6511 |
| 660       | 2.6            | 0                     | -16.5160 | 2.1947 | -15.3132 | 1.9385 | -48.2719 | -2.6790 | 33.3545 | 58.8104   | -35.1755 | 6.4784   | -0.3799 | -28.7290 | -4.1957 | 29.3882 |
| 660       | 2.7            | 0                     | -16.7545 | 2.2411 | -15.4121 | 1.9580 | -49.8298 | -2.8628 | 34.8902 | 57.1738   | -33.8531 | 6.1607   | -0.3566 | -29.6921 | -4.3461 | 30.4571 |
| 660       | 2.8            | 0                     | -16.7545 | 2.2411 | -15.4121 | 1.9580 | -49.8298 | -2.8628 | 34.8902 | 57.1738   | -33.8531 | 6.1607   | -0.3566 | -29.6921 | -4.3461 | 30.4571 |
| 530       | 1.5            | 0                     | -15.4483 | 2.0275 | -15.1533 | 1.9529 | -22.3937 | 2.0759  | 2.6127  | -38.6483  | 17.9350  | -2.8595  | 0.1543  | -7.2936  | -0.0297 | 3.0690  |



| $\lambda$ | D <sub>f</sub> | f <sub>organics</sub> | c0       | c1     | g0       | g1     | H0       | H1      | H2      | s0        | s1      | s2       | s3      | k0       | k1      | k2      |
|-----------|----------------|-----------------------|----------|--------|----------|--------|----------|---------|---------|-----------|---------|----------|---------|----------|---------|---------|
| 530       | 1.5            | 5                     | -15.4354 | 2.0230 | -15.1684 | 1.9518 | -29.0070 | 0.4851  | 11.6650 | -12.3844  | 4.3217  | -0.5290  | 0.0223  | -12.7832 | -1.3611 | 10.6311 |
| 530       | 1.5            | 25                    | -15.4925 | 2.0170 | -15.2770 | 1.9552 | -21.9488 | 1.9199  | 2.8396  | 10.3025   | -7.6207 | 1.5526   | -0.0978 | -6.2980  | -0.0626 | 2.6354  |
| 530       | 1.5            | 50                    | -15.7149 | 2.0309 | -15.4302 | 1.9540 | -19.7990 | 2.4336  | -0.0981 | -35.8653  | 16.1143 | -2.4826  | 0.1292  | -4.8126  | 0.2522  | 0.8143  |
| 530       | 1.5            | 70                    | -15.9573 | 2.0492 | -15.6296 | 1.9555 | -22.5647 | 1.7752  | 3.7288  | -40.5993  | 17.1966 | -2.4689  | 0.1189  | -7.0733  | -0.3645 | 4.2926  |
| 530       | 1.6            | 0                     | -15.4582 | 2.0301 | -15.1645 | 1.9541 | -30.2522 | 0.2839  | 13.0506 | -13.4329  | 5.3086  | -0.7402  | 0.0353  | -14.1640 | -1.6051 | 12.2251 |
| 530       | 1.6            | 5                     | -15.4217 | 2.0195 | -15.2076 | 1.9574 | -23.3446 | 1.5936  | 4.7752  | -49.7193  | 22.9073 | -3.5832  | 0.1883  | -8.0395  | -0.4520 | 4.9281  |
| 530       | 1.6            | 15                    | -15.4624 | 2.0151 | -15.2338 | 1.9474 | -24.8580 | 1.2147  | 6.9134  | -18.5029  | 6.1204  | -0.6164  | 0.0157  | -9.4089  | -0.8034 | 6.9306  |
| 530       | 1.6            | 50                    | -15.6189 | 2.0175 | -15.4049 | 1.9499 | -20.6727 | 2.0390  | 1.7690  | -44.1478  | 19.1614 | -2.8166  | 0.1389  | -5.3902  | -0.0480 | 2.1902  |
| 530       | 1.6            | 70                    | -15.8549 | 2.0337 | -15.6103 | 1.9529 | -23.6874 | 1.4126  | 5.5919  | -41.5504  | 18.4041 | -2.7716  | 0.1403  | -6.9495  | -0.4497 | 4.5236  |
| 530       | 1.7            | 0                     | -15.3457 | 2.0117 | -15.1085 | 1.9449 | -22.1744 | 1.8602  | 3.2575  | -75.8437  | 36.5469 | -5.9322  | 0.3222  | -6.9526  | -0.1792 | 3.4198  |
| 530       | 1.7            | 1                     | -15.4024 | 2.0197 | -15.1596 | 1.9518 | -24.1066 | 1.4635  | 5.6682  | -58.3757  | 27.5215 | -4.3801  | 0.2334  | -8.8238  | -0.5832 | 5.8255  |
| 530       | 1.7            | 5                     | -15.3735 | 2.0148 | -15.1536 | 1.9483 | -28.3354 | 0.3895  | 11.6814 | -40.0908  | 17.5714 | -2.6200  | 0.1315  | -12.1463 | -1.4425 | 10.6119 |
| 530       | 1.7            | 10                    | -15.4378 | 2.0218 | -15.1620 | 1.9477 | -23.1438 | 1.7445  | 4.1842  | -76.1110  | 36.8942 | -6.0263  | 0.3294  | -7.5993  | -0.2535 | 4.0447  |
| 530       | 1.7            | 15                    | -15.4566 | 2.0202 | -15.2130 | 1.9520 | -22.5137 | 1.8176  | 3.5627  | -71.1980  | 34.3472 | -5.5807  | 0.3031  | -7.2562  | -0.2467 | 3.8218  |
| 530       | 1.7            | 20                    | -15.4286 | 2.0140 | -15.2137 | 1.9479 | -29.5085 | 0.1516  | 13.1085 | -26.2377  | 10.3361 | -1.3589  | 0.0583  | -13.0825 | -1.6438 | 11.8172 |
| 530       | 1.7            | 25                    | -15.5002 | 2.0207 | -15.2542 | 1.9504 | -25.7225 | 1.0879  | 7.8131  | -64.1386  | 29.9268 | -4.7034  | 0.2472  | -9.8893  | -0.8603 | 7.3838  |
| 530       | 1.7            | 30                    | -15.5068 | 2.0173 | -15.2676 | 1.9484 | -22.6320 | 1.7391  | 3.8814  | -67.8289  | 32.2766 | -5.1718  | 0.2769  | -7.4854  | -0.3559 | 4.3434  |
| 530       | 1.7            | 40                    | -15.6444 | 2.0317 | -15.3452 | 1.9509 | -25.2849 | 1.2893  | 6.8754  | -18.2671  | 7.6862  | -1.1265  | 0.0563  | -9.4102  | -0.6937 | 6.5832  |
| 530       | 1.7            | 50                    | -15.6533 | 2.0231 | -15.4243 | 1.9526 | -24.0667 | 1.3764  | 5.8946  | -30.6855  | 13.3950 | -1.9923  | 0.0995  | -8.0697  | -0.5757 | 5.4641  |
| 530       | 1.7            | 60                    | -15.7950 | 2.0357 | -15.5214 | 1.9543 | -24.5993 | 1.3187  | 6.3996  | -32.0283  | 14.5091 | -2.2417  | 0.1164  | -8.5442  | -0.6647 | 6.0790  |
| 530       | 1.7            | 70                    | -15.8112 | 2.0278 | -15.6123 | 1.9528 | -30.4234 | 0.0299  | 14.0204 | -13.5435  | 5.1912  | -0.6883  | 0.0307  | -12.3873 | -1.5659 | 11.3281 |
| 530       | 1.7            | 80                    | -16.0606 | 2.0611 | -15.7484 | 1.9540 | -34.5742 | -0.6042 | 18.5583 | -14.2286  | 5.1097  | -0.6168  | 0.0243  | -14.3195 | -1.8881 | 13.6114 |
| 530       | 1.7            | 90                    | -16.0906 | 2.0656 | -15.8622 | 1.9540 | -23.3292 | 1.3332  | 5.9157  | -10.2931  | 3.6915  | -0.4636  | 0.0198  | -5.9208  | -0.5010 | 4.4057  |
| 530       | 1.8            | 0                     | -15.3770 | 2.0207 | -15.1030 | 1.9442 | -22.3631 | 1.8124  | 3.5980  | -116.1937 | 55.9503 | -9.0290  | 0.4865  | -6.5949  | -0.1207 | 3.0855  |
| 530       | 1.8            | 5                     | -15.4707 | 2.0325 | -15.1466 | 1.9464 | -25.4391 | 1.2396  | 7.2465  | -113.7617 | 54.9201 | -8.8863  | 0.4800  | -9.4615  | -0.6792 | 6.5818  |
| 530       | 1.8            | 50                    | -15.6722 | 2.0302 | -15.3889 | 1.9469 | -26.8964 | 0.8227  | 9.4017  | -81.3740  | 38.0949 | -5.9855  | 0.3140  | -10.2878 | -1.0140 | 8.2289  |
| 530       | 1.8            | 70                    | -15.8629 | 2.0396 | -15.6026 | 1.9506 | -26.6440 | 0.8021  | 9.3698  | -29.9995  | 12.5153 | -1.7632  | 0.0829  | -9.7750  | -1.0421 | 8.1523  |
| 530       | 1.9            | 0                     | -15.3627 | 2.0203 | -15.0710 | 1.9375 | -25.2539 | 1.1174  | 7.6052  | -138.0865 | 65.9737 | -10.5439 | 0.5621  | -9.4218  | -0.7977 | 6.9900  |
| 530       | 1.9            | 5                     | -15.3602 | 2.0178 | -15.0659 | 1.9333 | -28.0789 | 0.4681  | 11.3749 | -107.4108 | 50.0976 | -7.8234  | 0.4075  | -12.2964 | -1.4550 | 10.8210 |
| 530       | 1.9            | 25                    | -15.4880 | 2.0251 | -15.1747 | 1.9369 | -22.8383 | 1.6702  | 4.3719  | -109.5103 | 51.0049 | -7.9524  | 0.4138  | -7.2266  | -0.3279 | 4.2123  |
| 530       | 1.9            | 50                    | -15.6402 | 2.0292 | -15.3707 | 1.9434 | -30.1632 | 0.0449  | 13.9158 | -61.7963  | 27.5115 | -4.1197  | 0.2063  | -12.3549 | -1.5363 | 11.2004 |
| 530       | 1.9            | 70                    | -15.9053 | 2.0507 | -15.5866 | 1.9482 | -29.1671 | 0.3470  | 12.3573 | -59.0646  | 26.7554 | -4.0790  | 0.2081  | -10.9436 | -1.2535 | 9.5521  |
| 530       | 2              | 0                     | -15.3493 | 2.0228 | -14.9997 | 1.9253 | -28.1476 | 0.4633  | 11.5022 | -111.8723 | 51.4189 | -7.9118  | 0.4065  | -11.9231 | -1.3635 | 10.3555 |
| 530       | 2              | 5                     | -15.4374 | 2.0345 | -15.0530 | 1.9303 | -29.2671 | 0.2896  | 12.7102 | -97.4479  | 44.4187 | -6.7869  | 0.3466  | -12.6300 | -1.4759 | 11.1370 |
| 530       | 2              | 25                    | -15.5146 | 2.0330 | -15.1524 | 1.9322 | -25.7346 | 1.0450  | 8.1582  | -127.5849 | 59.1440 | -9.1710  | 0.4746  | -9.5137  | -0.8343 | 7.2475  |
| 530       | 2              | 50                    | -15.7279 | 2.0467 | -15.3507 | 1.9393 | -26.3697 | 0.9306  | 8.8733  | -132.3193 | 61.4817 | -9.5533  | 0.4953  | -9.2747  | -0.8336 | 7.1611  |
| 530       | 2              | 70                    | -15.9225 | 2.0590 | -15.5251 | 1.9379 | -28.8131 | 0.4335  | 11.9367 | -91.6314  | 41.5217 | -6.3004  | 0.3191  | -10.5808 | -1.1770 | 9.1418  |
| 530       | 2.1            | 0                     | -15.4277 | 2.0413 | -14.9538 | 1.9170 | -31.3780 | -0.1503 | 15.4513 | -63.5038  | 26.1653 | -3.5666  | 0.1598  | -14.0733 | -1.7711 | 12.9918 |
| 530       | 2.1            | 5                     | -15.4687 | 2.0446 | -14.9928 | 1.9200 | -31.5647 | -0.1735 | 15.6231 | -66.1172  | 27.5916 | -3.8238  | 0.1751  | -14.4141 | -1.8410 | 13.4176 |
| 530       | 2.1            | 25                    | -15.5506 | 2.0450 | -15.0785 | 1.9202 | -28.9548 | 0.4140  | 12.1588 | -89.2740  | 39.1348 | -5.7337  | 0.2801  | -12.2176 | -1.3728 | 10.6288 |

| $\lambda$ | D <sub>f</sub> | f <sub>organics</sub> | c0       | c1     | g0       | g1     | H0       | H1      | H2      | s0        | s1       | s2      | s3      | k0       | k1      | k2      |
|-----------|----------------|-----------------------|----------|--------|----------|--------|----------|---------|---------|-----------|----------|---------|---------|----------|---------|---------|
| 530       | 2.1            | 50                    | -15.7581 | 2.0580 | -15.2814 | 1.9284 | -27.0473 | 0.8296  | 9.6674  | -125.3823 | 57.0188  | -8.6725 | 0.4403  | -9.8592  | -0.9329 | 7.8765  |
| 530       | 2.1            | 70                    | -16.0226 | 2.0821 | -15.4889 | 1.9320 | -28.8712 | 0.4955  | 11.8323 | -117.5095 | 53.1077  | -8.0261 | 0.4048  | -10.4563 | -1.1220 | 8.9375  |
| 530       | 2.2            | 0                     | -15.4744 | 2.0543 | -14.8869 | 1.9057 | -32.6405 | -0.3626 | 16.9392 | -24.6864  | 5.7529   | -0.0381 | -0.0411 | -15.3279 | -2.0051 | 14.5306 |
| 530       | 2.2            | 1                     | -15.4866 | 2.0559 | -14.8813 | 1.9041 | -34.3386 | -0.7204 | 19.0909 | -23.0105  | 5.1492   | 0.0225  | -0.0423 | -16.4775 | -2.2411 | 15.9679 |
| 530       | 2.2            | 5                     | -15.4982 | 2.0558 | -14.9006 | 1.9052 | -34.1257 | -0.6766 | 18.8197 | -25.2534  | 6.2635   | -0.1630 | -0.0319 | -16.1602 | -2.1793 | 15.5842 |
| 530       | 2.2            | 10                    | -15.5622 | 2.0638 | -14.9495 | 1.9106 | -33.3220 | -0.4539 | 17.6143 | -31.3818  | 9.4207   | -0.6972 | -0.0022 | -15.2506 | -1.9580 | 14.3336 |
| 530       | 2.2            | 15                    | -15.5653 | 2.0607 | -14.9693 | 1.9103 | -31.9414 | -0.1665 | 15.8674 | -33.4950  | 10.3724  | -0.8393 | 0.0049  | -14.7735 | -1.8725 | 13.7811 |
| 530       | 2.2            | 20                    | -15.5853 | 2.0599 | -14.9847 | 1.9082 | -31.4042 | -0.0434 | 15.1449 | -52.5260  | 20.0485  | -2.4740 | 0.0967  | -14.1882 | -1.7458 | 13.0338 |
| 530       | 2.2            | 25                    | -15.6060 | 2.0596 | -15.0166 | 1.9097 | -30.8199 | 0.0778  | 14.4001 | -53.4761  | 20.5159  | -2.5496 | 0.1007  | -13.7828 | -1.6703 | 12.5548 |
| 530       | 2.2            | 30                    | -15.6303 | 2.0601 | -15.0392 | 1.9093 | -30.6155 | 0.1251  | 14.1210 | -52.9759  | 20.3525  | -2.5376 | 0.1009  | -13.6031 | -1.6370 | 12.3484 |
| 530       | 2.2            | 40                    | -15.7160 | 2.0667 | -15.1111 | 1.9119 | -29.0655 | 0.4714  | 12.0828 | -72.8733  | 30.2813  | -4.1828 | 0.1914  | -12.0823 | -1.3276 | 10.4756 |
| 530       | 2.2            | 50                    | -15.8023 | 2.0727 | -15.1879 | 1.9135 | -29.6343 | 0.3555  | 12.7851 | -98.7155  | 43.2500  | -6.3430 | 0.3108  | -11.8632 | -1.3104 | 10.3195 |
| 530       | 2.2            | 60                    | -15.9231 | 2.0823 | -15.3025 | 1.9185 | -27.3411 | 0.8217  | 9.9330  | -112.0073 | 49.6061  | -7.3490 | 0.3636  | -9.9017  | -0.9560 | 8.0637  |
| 530       | 2.2            | 70                    | -16.0740 | 2.0972 | -15.4269 | 1.9226 | -26.7874 | 0.9328  | 9.2630  | -113.3254 | 50.2233  | -7.4417 | 0.3681  | -8.9568  | -0.8233 | 7.1374  |
| 530       | 2.2            | 80                    | -16.2901 | 2.1253 | -15.5877 | 1.9287 | -26.9575 | 0.9087  | 9.4894  | -107.3439 | 47.4461  | -7.0096 | 0.3456  | -8.1556  | -0.7512 | 6.5267  |
| 530       | 2.2            | 90                    | -16.3319 | 2.1369 | -15.6593 | 1.9231 | -27.1610 | 0.7963  | 10.0927 | -73.9224  | 31.8899  | -4.6050 | 0.2220  | -7.6132  | -0.7757 | 6.4075  |
| 530       | 2.3            | 0                     | -15.5285 | 2.0646 | -14.8693 | 1.9029 | -32.6492 | -0.2718 | 16.6524 | -19.7277  | 3.4914   | 0.3010  | -0.0578 | -15.4153 | -1.9543 | 14.4179 |
| 530       | 2.4            | 0                     | -15.6642 | 2.0932 | -14.8418 | 1.8984 | -34.9362 | -0.6474 | 19.2588 | 6.1155    | -9.7140  | 2.5202  | -0.1808 | -17.1146 | -2.2573 | 16.4319 |
| 530       | 2.5            | 0                     | -15.7697 | 2.1177 | -14.7974 | 1.8926 | -37.8215 | -1.1848 | 22.7353 | 29.8303   | -21.7347 | 4.5243  | -0.2910 | -18.8315 | -2.5812 | 18.5157 |
| 530       | 2.6            | 0                     | -15.8535 | 2.1392 | -14.7374 | 1.8852 | -40.0848 | -1.5995 | 25.4485 | 49.5473   | -31.6996 | 6.1786  | -0.3816 | -20.5944 | -2.9240 | 20.6830 |
| 530       | 2.7            | 0                     | -16.0074 | 2.1717 | -14.7684 | 1.8930 | -42.8377 | -2.1139 | 28.7616 | 69.7092   | -41.8366 | 7.8571  | -0.4735 | -21.9356 | -3.1892 | 22.3479 |
| 530       | 2.8            | 0                     | -16.0074 | 2.1717 | -14.7684 | 1.8930 | -42.8377 | -2.1139 | 28.7616 | 69.7092   | -41.8366 | 7.8571  | -0.4735 | -21.9356 | -3.1892 | 22.3479 |
| 467       | 1.5            | 0                     | -15.2250 | 2.0243 | -14.9285 | 1.9460 | -21.3605 | 2.1205  | 2.0663  | -35.1209  | 16.2828  | -2.5973 | 0.1403  | -6.4219  | 0.0321  | 2.4416  |
| 467       | 1.5            | 5                     | -15.2593 | 2.0374 | -14.9620 | 1.9575 | -20.6890 | 2.5173  | 0.4504  | -2.4744   | -1.8736  | 0.7619  | -0.0666 | -4.6311  | 0.6979  | -0.7219 |
| 467       | 1.5            | 25                    | -15.1857 | 2.0120 | -15.0053 | 1.9525 | -23.9461 | 1.2193  | 6.5281  | 25.4720   | -15.2767 | 2.8497  | -0.1714 | -7.9766  | -0.6104 | 5.4794  |
| 467       | 1.5            | 50                    | -15.3527 | 2.0269 | -15.0907 | 1.9490 | -19.2520 | 2.3718  | 0.0752  | -41.9971  | 19.6730  | -3.1445 | 0.1693  | -4.2522  | 0.2672  | 0.5329  |
| 467       | 1.5            | 70                    | -15.4996 | 2.0464 | -15.1718 | 1.9464 | -16.4574 | 2.8418  | -2.9382 | -58.8100  | 26.4711  | -4.0238 | 0.2051  | -2.5874  | 0.4590  | -0.9002 |
| 467       | 1.6            | 0                     | -15.2353 | 2.0268 | -14.9409 | 1.9474 | -28.7077 | 0.4507  | 11.8045 | -3.6309   | 0.3396   | 0.1020  | -0.0122 | -12.9050 | -1.4491 | 11.0611 |
| 467       | 1.6            | 5                     | -15.1087 | 2.0092 | -14.9205 | 1.9485 | -23.1181 | 1.4085  | 5.4647  | -74.3275  | 36.0744  | -5.9106 | 0.3245  | -8.1900  | -0.6441 | 5.7107  |
| 467       | 1.6            | 25                    | -15.1530 | 2.0094 | -14.9482 | 1.9418 | -27.0336 | 0.4617  | 10.8670 | -7.1065   | 0.0965   | 0.4647  | -0.0496 | -11.0903 | -1.3638 | 9.8096  |
| 467       | 1.6            | 50                    | -15.2620 | 2.0145 | -15.0787 | 1.9467 | -23.7455 | 1.1604  | 6.7018  | -38.6478  | 17.0336  | -2.5500 | 0.1282  | -7.8347  | -0.7112 | 5.8602  |
| 467       | 1.6            | 70                    | -15.4007 | 2.0318 | -15.1680 | 1.9461 | -25.4695 | 0.8308  | 8.8622  | -17.6725  | 7.4038   | -1.0838 | 0.0541  | -8.3194  | -0.8399 | 6.6743  |
| 467       | 1.7            | 0                     | -15.1155 | 2.0073 | -14.8876 | 1.9386 | -22.1811 | 1.6816  | 4.0381  | -31.3774  | 14.5618  | -2.3199 | 0.1250  | -7.1132  | -0.3364 | 4.1005  |
| 467       | 1.7            | 1                     | -15.1170 | 2.0132 | -14.8921 | 1.9455 | -26.0870 | 0.7824  | 9.2430  | -47.7187  | 23.0792  | -3.7922 | 0.2096  | -10.6256 | -1.1477 | 8.7725  |
| 467       | 1.7            | 5                     | -15.1067 | 2.0121 | -14.8977 | 1.9440 | -30.8519 | -0.4743 | 16.1665 | 7.4308    | -7.4722  | 1.7897  | -0.1275 | -14.4195 | -2.1684 | 14.3606 |
| 467       | 1.7            | 10                    | -15.1654 | 2.0187 | -14.8977 | 1.9428 | -19.8279 | 2.3611  | 0.4682  | -87.7277  | 44.3931  | -7.5678 | 0.4318  | -4.8964  | 0.2865  | 0.7859  |
| 467       | 1.7            | 15                    | -15.1618 | 2.0143 | -14.9404 | 1.9467 | -23.6818 | 1.3451  | 6.0014  | -53.7600  | 26.1864  | -4.3148 | 0.2382  | -8.2849  | -0.6135 | 5.6836  |
| 467       | 1.7            | 20                    | -15.1850 | 2.0187 | -14.9519 | 1.9452 | -31.4590 | -0.5230 | 16.6700 | -16.5877  | 5.7736   | -0.6280 | 0.0187  | -14.6983 | -2.1725 | 14.5528 |
| 467       | 1.7            | 25                    | -15.2028 | 2.0171 | -14.9556 | 1.9427 | -25.4709 | 0.9410  | 8.3817  | -22.6606  | 9.0044   | -1.1840 | 0.0500  | -9.5186  | -0.9018 | 7.3789  |
| 467       | 1.7            | 30                    | -15.1800 | 2.0103 | -14.9541 | 1.9397 | -23.6609 | 1.3071  | 6.1293  | -84.1306  | 41.7810  | -6.9752 | 0.3890  | -8.4906  | -0.7054 | 6.1423  |

| $\lambda$ | D <sub>f</sub> | f <sub>organics</sub> | c0       | c1     | g0       | g1     | H0       | H1      | H2      | s0        | s1       | s2       | s3      | k0       | k1      | k2      |
|-----------|----------------|-----------------------|----------|--------|----------|--------|----------|---------|---------|-----------|----------|----------|---------|----------|---------|---------|
| 467       | 1.7            | 40                    | -15.3097 | 2.0274 | -15.0127 | 1.9423 | -25.1544 | 1.1019  | 7.6760  | 31.1196   | -17.1699 | 3.0401   | -0.1762 | -9.5844  | -0.8668 | 7.3337  |
| 467       | 1.7            | 50                    | -15.2976 | 2.0204 | -15.0740 | 1.9454 | -22.9614 | 1.4066  | 5.4430  | -46.2425  | 21.7884  | -3.4835  | 0.1870  | -7.2677  | -0.5266 | 4.9292  |
| 467       | 1.7            | 60                    | -15.3859 | 2.0313 | -15.1169 | 1.9447 | -27.6765 | 0.4446  | 11.3400 | -17.9367  | 7.7740   | -1.1630  | 0.0586  | -10.9685 | -1.3040 | 9.6534  |
| 467       | 1.7            | 70                    | -15.3723 | 2.0284 | -15.1650 | 1.9450 | -34.1261 | -1.0020 | 19.8687 | 10.2521   | -6.5287  | 1.2364   | -0.0745 | -15.2400 | -2.3052 | 15.4740 |
| 467       | 1.7            | 80                    | -15.5774 | 2.0685 | -15.2111 | 1.9461 | -37.1340 | -1.3591 | 22.8655 | 10.2683   | -6.7329  | 1.2976   | -0.0790 | -15.9493 | -2.3255 | 16.0399 |
| 467       | 1.7            | 90                    | -15.3685 | 2.0509 | -15.1912 | 1.9437 | -23.1269 | 1.1428  | 6.8196  | -5.2663   | 1.5274   | -0.1471  | 0.0042  | -6.3543  | -0.6471 | 5.1619  |
| 467       | 1.8            | 0                     | -15.7285 | 2.0831 | -15.2932 | 1.9592 | -31.1127 | -0.1752 | 15.4226 | -130.1084 | 61.2659  | -9.6866  | 0.5122  | -11.8049 | -1.4565 | 10.7326 |
| 467       | 1.8            | 5                     | -15.1723 | 2.0243 | -14.8433 | 1.9339 | -24.3049 | 1.3340  | 6.4867  | -122.3392 | 61.1171  | -10.2353 | 0.5724  | -8.4259  | -0.5207 | 5.5241  |
| 467       | 1.8            | 25                    | -15.2531 | 2.0294 | -14.9630 | 1.9440 | -31.7033 | -0.4742 | 16.6739 | -37.6599  | 17.5699  | -2.7950  | 0.1499  | -14.5915 | -2.0714 | 14.1873 |
| 467       | 1.8            | 50                    | -15.3357 | 2.0308 | -15.0297 | 1.9378 | -27.1692 | 0.5606  | 10.6962 | -58.7503  | 27.6982  | -4.3992  | 0.2337  | -10.5063 | -1.1779 | 8.9745  |
| 467       | 1.8            | 70                    | -15.3919 | 2.0345 | -15.1511 | 1.9418 | -28.5653 | 0.1474  | 12.9522 | 2.0684    | -3.2605  | 0.8269   | -0.0588 | -11.2729 | -1.4948 | 10.5753 |
| 467       | 1.9            | 0                     | -15.1396 | 2.0166 | -14.8460 | 1.9298 | -23.2852 | 1.4146  | 5.6731  | -177.0870 | 88.0780  | -14.6465 | 0.8125  | -7.7418  | -0.5058 | 5.1251  |
| 467       | 1.9            | 5                     | -15.1009 | 2.0157 | -14.7945 | 1.9253 | -27.2283 | 0.4626  | 11.1008 | -101.8639 | 48.3998  | -7.7015  | 0.4089  | -11.3532 | -1.3673 | 10.0462 |
| 467       | 1.9            | 25                    | -15.1841 | 2.0197 | -14.8990 | 1.9323 | -23.6641 | 1.2782  | 6.3534  | -120.0116 | 58.0425  | -9.4039  | 0.5089  | -7.7863  | -0.5803 | 5.4254  |
| 467       | 1.9            | 50                    | -15.3412 | 2.0360 | -15.0293 | 1.9368 | -30.3293 | -0.2013 | 15.0883 | -38.5780  | 17.0127  | -2.5392  | 0.1272  | -12.5334 | -1.6966 | 11.9042 |
| 467       | 1.9            | 70                    | -15.4933 | 2.0551 | -15.1380 | 1.9394 | -30.3382 | -0.1092 | 14.8490 | -61.8573  | 29.2308  | -4.6502  | 0.2476  | -11.8205 | -1.5400 | 11.0665 |
| 467       | 2              | 0                     | -15.1130 | 2.0169 | -14.7616 | 1.9148 | -25.8479 | 0.7847  | 9.2983  | -129.2946 | 61.6969  | -9.8565  | 0.5259  | -9.7768  | -1.0037 | 7.9982  |
| 467       | 2              | 5                     | -15.1751 | 2.0318 | -14.7893 | 1.9236 | -27.7512 | 0.4176  | 11.6102 | -124.5039 | 59.8334  | -9.6403  | 0.5194  | -11.3581 | -1.3220 | 9.9511  |
| 467       | 2              | 25                    | -15.2150 | 2.0287 | -14.8585 | 1.9243 | -24.0297 | 1.2301  | 6.7896  | -157.8741 | 76.3599  | -12.3547 | 0.6673  | -7.7562  | -0.5524 | 5.3735  |
| 467       | 2              | 50                    | -15.3907 | 2.0468 | -15.0066 | 1.9321 | -26.4881 | 0.6991  | 9.9642  | -161.8839 | 78.3793  | -12.6905 | 0.6858  | -9.1129  | -0.9106 | 7.3901  |
| 467       | 2              | 70                    | -15.4694 | 2.0565 | -15.0517 | 1.9249 | -30.4092 | -0.1312 | 15.0224 | -101.0511 | 47.6277  | -7.5203  | 0.3967  | -11.6095 | -1.5002 | 10.8573 |
| 467       | 2.1            | 0                     | -15.2008 | 2.0367 | -14.7349 | 1.9094 | -28.8421 | 0.1785  | 13.0826 | -80.4684  | 35.5475  | -5.2334  | 0.2558  | -11.9144 | -1.4465 | 10.7392 |
| 467       | 2.1            | 5                     | -15.1910 | 2.0391 | -14.7273 | 1.9126 | -28.8999 | 0.1716  | 13.1464 | -88.4309  | 39.8327  | -5.9982  | 0.3011  | -12.3942 | -1.5521 | 11.3555 |
| 467       | 2.1            | 25                    | -15.2680 | 2.0433 | -14.7903 | 1.9126 | -25.5820 | 0.9624  | 8.6347  | -105.0686 | 48.0961  | -7.3573  | 0.3752  | -9.3550  | -0.8579 | 7.3516  |
| 467       | 2.1            | 50                    | -15.4216 | 2.0583 | -14.9261 | 1.9188 | -25.2955 | 1.0100  | 8.3313  | -144.4405 | 68.3194  | -10.8100 | 0.5711  | -8.3038  | -0.7025 | 6.2947  |
| 467       | 2.1            | 70                    | -15.5940 | 2.0833 | -15.0090 | 1.9172 | -26.8970 | 0.6971  | 10.3489 | -133.0941 | 62.4855  | -9.8108  | 0.5142  | -9.0259  | -0.9162 | 7.5009  |
| 467       | 2.2            | 0                     | -15.2165 | 2.0444 | -14.6641 | 1.8972 | -29.7629 | -0.0102 | 14.2948 | -19.1750  | 2.5816   | 0.6214   | -0.0879 | -12.8919 | -1.6601 | 12.0497 |
| 467       | 2.2            | 1                     | -15.1990 | 2.0474 | -14.6285 | 1.8974 | -31.8693 | -0.4877 | 17.0880 | -37.4604  | 12.7007  | -1.2323  | 0.0245  | -14.5741 | -2.0293 | 14.2235 |
| 467       | 2.2            | 5                     | -15.2217 | 2.0503 | -14.6575 | 1.9010 | -32.1649 | -0.5623 | 17.5039 | -29.3700  | 8.4060   | -0.4772  | -0.0195 | -14.2925 | -1.9765 | 13.8932 |
| 467       | 2.2            | 10                    | -15.2632 | 2.0552 | -14.6851 | 1.9035 | -30.8288 | -0.2051 | 15.5548 | -39.6139  | 13.7847  | -1.4087  | 0.0338  | -13.1405 | -1.6815 | 12.2617 |
| 467       | 2.2            | 15                    | -15.2330 | 2.0475 | -14.6699 | 1.8981 | -28.7418 | 0.2526  | 12.8496 | -31.1358  | 9.1435   | -0.5693  | -0.0164 | -12.4100 | -1.5347 | 11.3644 |
| 467       | 2.2            | 20                    | -15.2836 | 2.0534 | -14.7134 | 1.9019 | -27.9901 | 0.4408  | 11.7992 | -59.4431  | 23.8465  | -3.1090  | 0.1295  | -11.3847 | -1.3029 | 10.0230 |
| 467       | 2.2            | 25                    | -15.2842 | 2.0510 | -14.7214 | 1.9004 | -27.7322 | 0.4875  | 11.4924 | -72.1353  | 30.5181  | -4.2737  | 0.1971  | -11.2953 | -1.2954 | 9.9503  |
| 467       | 2.2            | 30                    | -15.3153 | 2.0539 | -14.7486 | 1.9018 | -28.1864 | 0.3865  | 12.0852 | -71.8006  | 30.5272  | -4.3065  | 0.2008  | -11.4609 | -1.3426 | 10.2089 |
| 467       | 2.2            | 40                    | -15.3567 | 2.0574 | -14.7739 | 1.9002 | -26.3214 | 0.8071  | 9.6421  | -91.1375  | 40.3701  | -5.9726  | 0.2945  | -9.8598  | -1.0011 | 8.1894  |
| 467       | 2.2            | 50                    | -15.4536 | 2.0703 | -14.8358 | 1.9036 | -26.8054 | 0.7214  | 10.2167 | -124.3192 | 57.2902  | -8.8383  | 0.4557  | -9.5292  | -0.9475 | 7.8526  |
| 467       | 2.2            | 60                    | -15.5219 | 2.0782 | -14.9051 | 1.9076 | -25.7403 | 0.9312  | 8.9352  | -130.0775 | 60.1462  | -9.3065  | 0.4811  | -8.5305  | -0.7861 | 6.7820  |
| 467       | 2.2            | 70                    | -15.6158 | 2.0930 | -14.9704 | 1.9112 | -27.6593 | 0.5370  | 11.3666 | -132.7757 | 61.6566  | -9.5787  | 0.4971  | -9.1078  | -0.9501 | 7.6951  |
| 467       | 2.2            | 80                    | -15.7060 | 2.1141 | -15.0054 | 1.9116 | -27.5942 | 0.5635  | 11.3242 | -101.5491 | 46.3602  | -7.0800  | 0.3610  | -8.3212  | -0.8496 | 6.9822  |
| 467       | 2.2            | 90                    | -15.5041 | 2.1010 | -14.9155 | 1.8988 | -26.4610 | 0.6389  | 10.5841 | -61.9217  | 27.1741  | -3.9960  | 0.1964  | -7.4641  | -0.8129 | 6.4600  |

| $\lambda$ | $D_f$ | $f_{\text{organics}}$ | $c_0$    | $c_1$  | $g_0$    | $g_1$  | $H_0$    | $H_1$   | $H_2$   | $s_0$    | $s_1$    | $s_2$   | $s_3$   | $k_0$    | $k_1$   | $k_2$   |
|-----------|-------|-----------------------|----------|--------|----------|--------|----------|---------|---------|----------|----------|---------|---------|----------|---------|---------|
| 467       | 2.3   | 0                     | -15.2744 | 2.0552 | -14.6573 | 1.8961 | -29.1260 | 0.2391  | 13.1161 | -11.3711 | -1.2798  | 1.2579  | -0.1228 | -12.8534 | -1.5781 | 11.7616 |
| 467       | 2.4   | 0                     | -15.3828 | 2.0789 | -14.6223 | 1.8898 | -31.8896 | -0.3003 | 16.5330 | 20.8495  | -18.1860 | 4.1848  | -0.2904 | -14.8163 | -1.9761 | 14.2390 |
| 467       | 2.5   | 0                     | -15.4665 | 2.0997 | -14.5745 | 1.8832 | -34.9085 | -0.9250 | 20.3731 | 52.4292  | -34.6302 | 7.0106  | -0.4510 | -16.7000 | -2.3711 | 16.6524 |
| 467       | 2.6   | 0                     | -15.5159 | 2.1151 | -14.4968 | 1.8723 | -37.2465 | -1.4072 | 23.3510 | 74.5120  | -46.0470 | 8.9528  | -0.5601 | -18.7793 | -2.8188 | 19.3463 |
| 467       | 2.7   | 0                     | -15.6455 | 2.1437 | -14.5196 | 1.8785 | -40.5182 | -2.0967 | 27.5370 | 96.3327  | -57.1947 | 10.8299 | -0.6646 | -20.4577 | -3.1879 | 21.5461 |
| 467       | 2.8   | 0                     | -15.6455 | 2.1437 | -14.5196 | 1.8785 | -40.5182 | -2.0967 | 27.5370 | 96.3327  | -57.1947 | 10.8299 | -0.6646 | -20.4577 | -3.1879 | 21.5461 |
